# Supplementary material
Source: PubMed Central journal article supplement (PMC4752199)
Supplement: NIHMS757489-supplement-Supp_Data.pdf [file NIHMS757489-supplement-Supp_Data.pdf]

**Supplementary materials**

**Journal title:** Drug Metabolism and Pharmacokinetics

**Article title:** Nicotine regulates the expression of UDP-glucuronosyltransferase (UGT) in humanized *UGT1* mouse brain

**Article authors:** Masaya Sakamoto, Tomoo Itoh, Robert H. Tukey, and Ryoichi Fujiwara

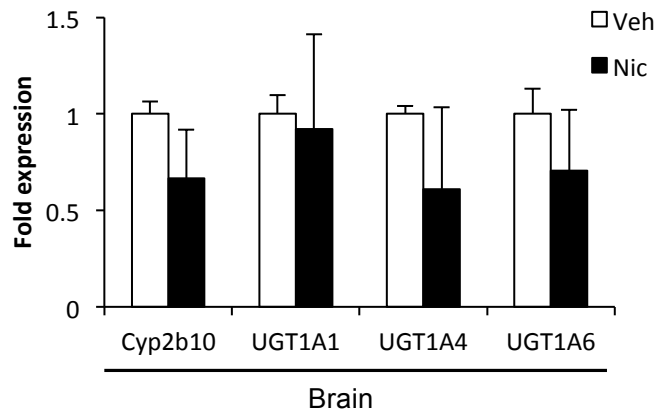

**Supplemental Fig. 1. Relative expression levels of human UGT1A mRNA and mouse Cyp2b10 in brains of *hUGT1* mice that were treated with 1.0 mg/kg nicotine (Nic) or vehicle (Veh).** *hUGT1* mice were treated 1.0 mg/kg nicotine, once daily for 7 days. Data were mean  $\pm$ SD of 3 mice in each group. The expression levels in vehicle-treated groups were defined as 1.

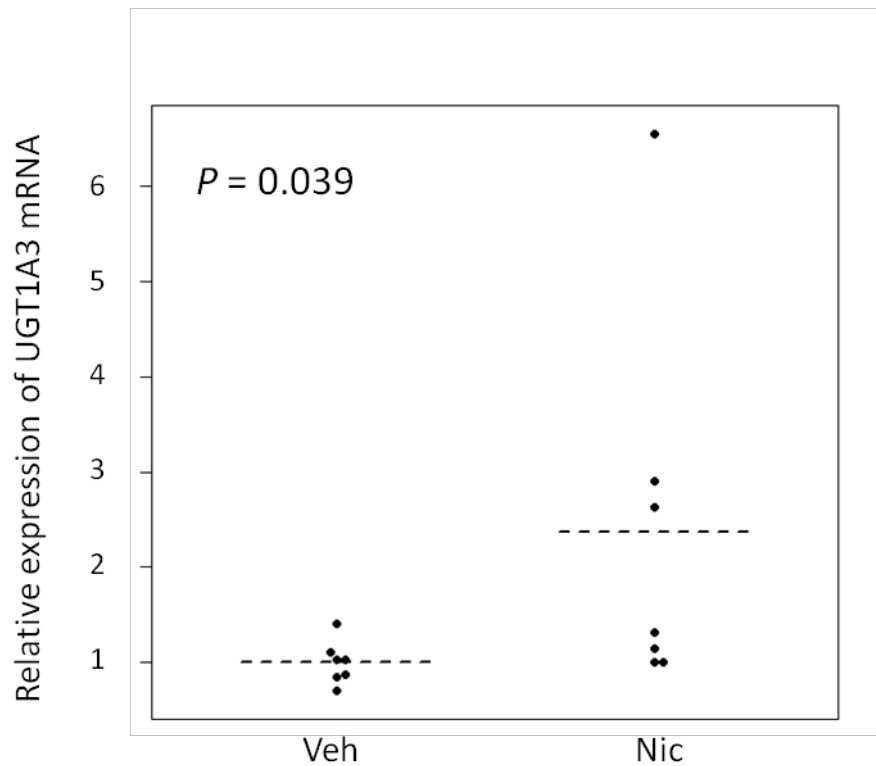

**Supplemental Fig. 2. Relative expression levels of human UGT1A3 mRNAs in brains of *hUGT1* mice that were treated with nicotine (Nic) or vehicle (Veh).** Seven mice each were treated with Nic or Veh as described in the manuscript (Group B). The mean expression level in the vehicle treated group was defined as 1. Brunner-Munzel test with significance set at 5% was used to examine the significance. Nicotine significantly induced the expression of UGT1A3 mRNA in the brain ( $P = 0.039$ ).

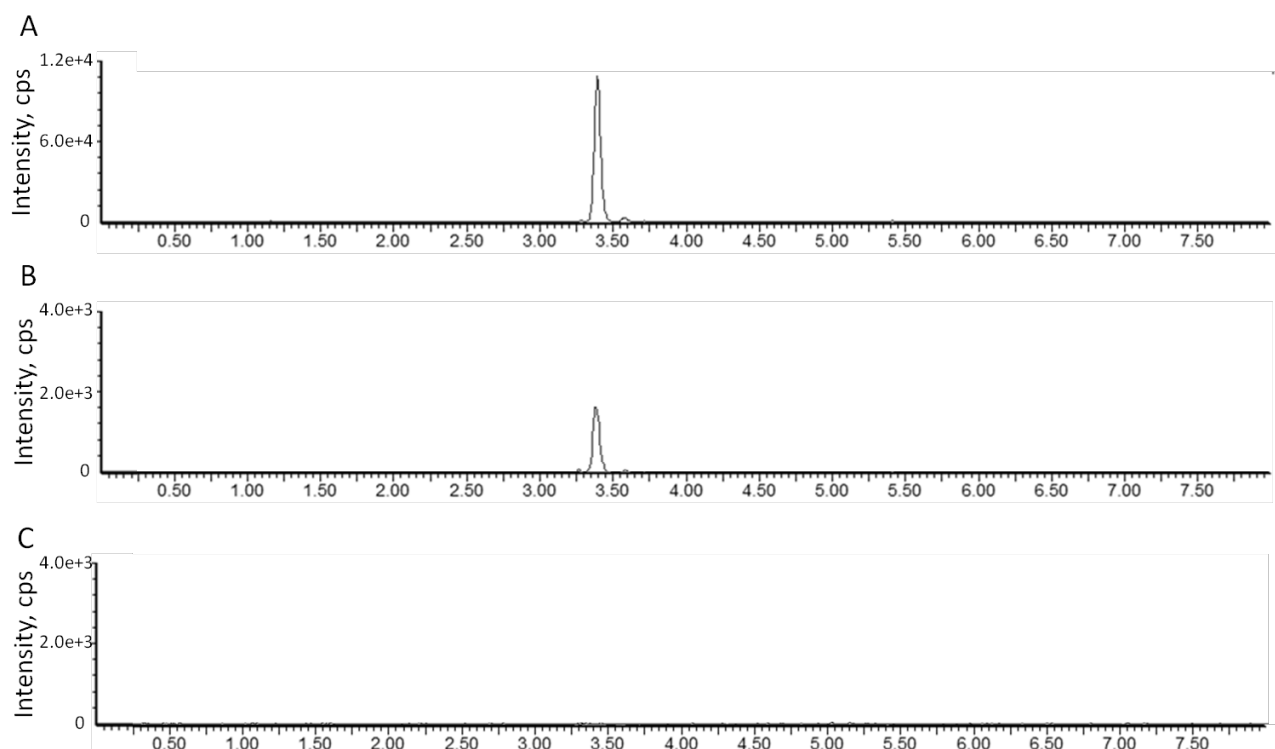

**Supplemental Fig. 3. Multiple reaction monitoring chromatograms of chenodeoxycholic acid (CDCA) glucuronide in the reaction mixtures.** CDCA was incubated with human liver microsomes (A) or brain microsomes from *hUGT1* mouse treated with nicotine (B) in the presence of UDPGA. CDCA was also incubated with brain microsomes from *hUGT1* mouse treated with nicotine in the absence of UDPGA (C). Peaks in A and B were CDCA glucuronides, as no peak was obtained in C. cps, counts per second.

---

**Supplemental Table 1. The detailed information of the RT-qPCR analysis**

---

**Nucleic acid extraction**

|                                                              |                                                                                                                                                                                                                                                                                                                                                                                                                                                                                                                     |
|--------------------------------------------------------------|---------------------------------------------------------------------------------------------------------------------------------------------------------------------------------------------------------------------------------------------------------------------------------------------------------------------------------------------------------------------------------------------------------------------------------------------------------------------------------------------------------------------|
| Procedure and/or instrumentation                             | Brain was homogenized in Traizol. The homogenate was added to fifth volume of chloroform and shaken severely for 15 seconds. After 3 min, the solution was centrifuged at 12,000 g for 15 min at 4°C. The supernatant was added to two volumes of isopropanol and then mixed moderately. After 10 min, the solution was centrifuged at 12,000 g for 10 min at 4°C. The pellet was washed with 80% ethanol and centrifuged at 12,000 g for 10 min at 4°C. The pellet was incubated in TE buffer for 10 min at 55 °C. |
| Nucleic acid quantification and Purity ( $A_{260}/A_{280}$ ) | The extracted RNA was quantitated for spectrophotometry using NanoDrop (Thermo Scientific). The $A_{260}/A_{280}$ ratio of the RNA sample was more than 1.8.                                                                                                                                                                                                                                                                                                                                                        |

**Reverse transcription**

|                                                |                                                                                                                                                                                                                                                   |
|------------------------------------------------|---------------------------------------------------------------------------------------------------------------------------------------------------------------------------------------------------------------------------------------------------|
| Complete reaction conditions and amount of RNA | A typical incubation mixture (10 $\mu$ L) contained 2 $\mu$ L of 5 $\times$ RT Master Mix, 1 $\mu$ g RNA, and nuclease-free water.                                                                                                                |
| Temperature and time                           | The reaction was performed in TaKaRa PCR Thermal Cycler Dice Gradient (Takara). The cycling parameters consisted of reverse transcription at 37°C for 15 minutes followed by 50°C for 5 minutes, and deactivation reaction at 98°C for 5 minutes. |

**qPCR oligonucleotides**

|                                    |                                                                                                                                                             |
|------------------------------------|-------------------------------------------------------------------------------------------------------------------------------------------------------------|
| Reaction volume and amount of cDNA | A typical incubation mixture (20 $\mu$ L) contained 10 $\mu$ L THUNDERBIRD SYBR qPCR Mix, 6 pmol forward primer, 6 pmol reverse primer, and 1 $\mu$ L cDNA. |
|------------------------------------|-------------------------------------------------------------------------------------------------------------------------------------------------------------|

**qPCR validation**

|                            |                                                            |
|----------------------------|------------------------------------------------------------|
| Specificity (melt, digest) | The melt peak analysis for each gene showed a single peak. |
|----------------------------|------------------------------------------------------------|

---

**Supplemental Table 2. The  $\Delta C_q$  and  $C_q$  values of the samples from brains and livers of *hUGT1* mice in group A.**

|               | Brain |       |       |       |       |       | Liver |       |       |       |       |       |
|---------------|-------|-------|-------|-------|-------|-------|-------|-------|-------|-------|-------|-------|
|               | Veh 1 | Veh 2 | Veh 3 | Nic 1 | Nic 2 | Nic 3 | Veh 1 | Veh 2 | Veh 3 | Nic 1 | Nic 2 | Nic 3 |
| Human UGT1A   |       |       |       |       |       |       |       |       |       |       |       |       |
| UGT1A1        | 17.48 | 18.12 | 18.75 | 18.61 | 19.63 | 19.4  | 7.96  | 6.96  | 7.14  | 7.92  | 9.83  | 7.37  |
| UGT1A3        | 12.74 | 12.62 | 12.99 | 12.28 | 12.19 | 11.67 | 3.79  | 2.97  | 3.26  | 3.61  | 4.72  | 3.75  |
| UGT1A4        | Tr    | Tr    | Tr    | Tr    | Tr    | Tr    | 5.23  | 4.59  | 4.73  | 4.59  | 5.62  | 5.05  |
| UGT1A5        | Tr    |
| UGT1A6        | 17.85 | 16.12 | 17.71 | 17.18 | 17.77 | 17.82 | 4.05  | 3.16  | 3.94  | 2.74  | 4.52  | 3.55  |
| UGT1A7        | Tr    | Tr    | Tr    | Tr    | Tr    | Tr    | 12.8  | 13.44 | 12.22 | 11.65 | 13.25 | 12.04 |
| UGT1A8        | Tr    |
| UGT1A9        | Tr    | Tr    | Tr    | Tr    | Tr    | Tr    | 11.14 | 10.56 | 10.50 | 9.20  | 10.93 | 9.42  |
| UGT1A10       | Tr    |
| Mouse Ugt2b   |       |       |       |       |       |       |       |       |       |       |       |       |
| Ugt2b1        | 14.27 | 13.98 | 14.54 | 15.83 | 15.99 | 14.76 | -0.21 | -0.1  | 0.4   | -0.39 | -0.01 | -0.09 |
| Ugt2b5        | 14.58 | 14.29 | 14.57 | 15.62 | 15.98 | 14.98 | 0.12  | 0.19  | 0.47  | -0.21 | 0.39  | -0.12 |
| Ugt2b34       | 16.64 | 17.06 | 19.85 | 18.87 | 19.47 | 18.46 | 0.59  | 0.55  | 1.05  | 0.11  | 0.73  | 0.49  |
| Ugt2b35       | 14.63 | 15.4  | 13.85 | 15.5  | 16.05 | 14.19 | 2.92  | 3.59  | 3.91  | 2.92  | 3.59  | 3.43  |
| Ugt2b36       | 17.02 | 18.03 | 17.18 | 18.03 | 18.97 | 16.79 | 2.94  | 2.74  | 2.71  | 2.49  | 2.79  | 2.76  |
| Ugt2b37       | 14.37 | 15.05 | 13.85 | 15.16 | 15.36 | 14.03 | 7.48  | 9.1   | 3.11  | 2.43  | 7.54  | 7.71  |
| Mouse Cyp2b   |       |       |       |       |       |       |       |       |       |       |       |       |
| Cyp2b10       | 16.32 | 17.51 | 19.11 | 18.68 | 18.37 | 18.71 | 0.37  | 0.23  | 0.46  | -0.28 | 0.42  | 0.02  |
| CPH ( $C_q$ ) | 15.86 | 15.36 | 15.45 | 15.58 | 15.63 | 15.58 | 17.60 | 17.37 | 17.44 | 17.26 | 17.66 | 17.19 |

$\Delta C_q$  values of the UGT and CYP gene, and the quantification cycle ( $C_q$ ) value of the CPH gene were listed, respectively.  $\Delta C_q$  value of the sample was determined by subtracting the  $C_q$  value of CPH gene from the  $C_q$  value of the UGT gene or CYP gene. Trace level (Tr) indicates that mRNA levels were below the detection limits. Veh = vehicle, Nic = nicotine.

**Supplemental Table 3. The  $\Delta C_q$  and  $C_q$  values of the samples from brains and livers of *hUGT1* mice in group B.**

|               | Brain |       |       |       |       |       | Liver |       |       |       |       |       |
|---------------|-------|-------|-------|-------|-------|-------|-------|-------|-------|-------|-------|-------|
|               | Veh 1 | Veh 2 | Veh 3 | Nic 1 | Nic 2 | Nic 3 | Veh 1 | Veh 2 | Veh 3 | Nic 1 | Nic 2 | Nic 3 |
| Human UGT1A   |       |       |       |       |       |       |       |       |       |       |       |       |
| UGT1A1        | 19.02 | 18.1  | 19.16 | 18.27 | 17.75 | 19.03 | 11.2  | 9.7   | 5.58  | 9.59  | 8.13  | 6.22  |
| UGT1A3        | 12.33 | 12.66 | 12.44 | 11.73 | 12.09 | 11.65 | 3.34  | 5.15  | 2.54  | 5.41  | 4.37  | 3.08  |
| UGT1A4        | Tr    | Tr    | Tr    | Tr    | Tr    | Tr    | 4.51  | 6.35  | 4.33  | 6.64  | 4.39  | 4.19  |
| UGT1A5        | Tr    |
| UGT1A6        | 17.14 | 18.95 | 17.87 | 19.3  | 18.5  | 17.72 | 3.63  | 5.12  | 3.48  | 5.46  | 4.31  | 3.5   |
| UGT1A7        | Tr    | Tr    | Tr    | Tr    | Tr    | Tr    | 12.57 | 13.22 | 11.58 | 13.09 | 12.54 | 11.58 |
| UGT1A8        | Tr    |
| UGT1A9        | Tr    | Tr    | Tr    | Tr    | Tr    | Tr    | 4.64  | 6.14  | 3.72  | 6.46  | 4.35  | 3.99  |
| UGT1A10       | Tr    |
| Mouse Ugt2b   |       |       |       |       |       |       |       |       |       |       |       |       |
| Ugt2b1        | 14.91 | 14.39 | 14.92 | 13.57 | 13.52 | 13.35 | 0.41  | 0.59  | 1.06  | 1.1   | 1.31  | 0.88  |
| Ugt2b5        | 15.27 | 15.28 | 16.14 | 15.23 | 15.13 | 15.08 | 0.8   | 0.79  | 1.11  | 1.24  | 1.48  | 1.68  |
| Ugt2b34       | 15.85 | 18.33 | 19.78 | 19.05 | 18.27 | 18.29 | 1.01  | 1.34  | 1.4   | 1.5   | 1.87  | 1.22  |
| Ugt2b35       | 16.27 | 15.25 | 16.41 | 14.9  | 14.73 | 14.55 | 3.51  | 4.24  | 4.18  | 4.41  | 4.31  | 4.46  |
| Ugt2b36       | 16.21 | 15.56 | 16.74 | 15.35 | 14.93 | 15.05 | 1.19  | 2.01  | 1.73  | 2.75  | 2.1   | 2.37  |
| Ugt2b37       | 15.36 | 14.25 | 15.33 | 13.73 | 13.91 | 13.87 | 10.35 | 9.62  | 10.28 | 9.24  | 10.67 | 8.98  |
| Mouse Cyp2b   |       |       |       |       |       |       |       |       |       |       |       |       |
| Cyp2b10       | 15.45 | 14.73 | 14.07 | 13.75 | 13.74 | 13.83 | 8.02  | 10.26 | 8.51  | 9.56  | 9.57  | 9.33  |
| CPH ( $C_q$ ) | 15.68 | 15.17 | 15.66 | 15.22 | 15.27 | 15.54 | 17.13 | 16.10 | 16.19 | 16.95 | 16.88 | 16.51 |

$\Delta C_q$  values of the UGT and CYP gene, and the quantification cycle ( $C_q$ ) value of the CPH gene were listed, respectively.  $\Delta C_q$  value of the sample was determined by subtracting the  $C_q$  value of CPH gene from the  $C_q$  value of the UGT gene or CYP gene. Trace level (Tr) indicates that mRNA levels were below the detection limits. Veh = vehicle, Nic = nicotine.
